# Supplementary material
Source: PubMed Central journal article supplement (PMC3308826)

## SUPPLEMENTAL FIGURES

**FIGURE S1:** Sphingoid bases induce *CHA1* in a dose-dependent manner. A, B, C. *CHA1* expression was measured by qRT-PCR before and after treatment with exogenous sphingoid bases. Expression versus dose was measured in JK9-3 $\alpha$  cells after addition of 0, 5, 10, and 25  $\mu$ M PHS (open circles) or DHS (closed squares) for 30 min. Three independent experiments were conducted. D. A time course of *CHA1* induction was measured at 0, 30, 60 and 120 min with 1  $\mu$ M PHS, also in JK9-3 $\alpha$ . Cells were treated in mid-log phase at 30 °C in YPD, all samples contained 0.025 % vehicle (DMSO).

**FIGURE S2:** Sphingoid bases are toxic above 5  $\mu$ M. A mid-log JK9-3 $\alpha$  culture in YPD was aliquoted into a microtiter plate with 0.3 ml per well, and then treated with 0, 0.5, 1, 5, 10 and 25  $\mu$ M PHS or DHS overnight. All cultures contained 0.025 % vehicle (DMSO). The final OD<sub>600</sub> was measured in a plate reader.

**FIGURE S3:** Identification of TLC spots containing complex sphingolipids by comparing the spots of inositol-labeled versus serine-labeled samples of wild type cells. Mid-log cultures grown in SC –thr were labeled for 6 hours with 20  $\mu$ Ci of <sup>3</sup>[H]-serine or <sup>3</sup>[H]-inositol. Lipids were extracted and separated according to “materials and methods”.

**FIGURE S4:** Complex sphingolipid synthesis is inhibited at the lowest dose of aureobasidin and fumonisin used in this study. Mid-log cultures grown in SC –thr were labeled with 20  $\mu$ Ci <sup>3</sup>[H]-serine for 4 hours, and then treated with 0.5  $\mu$ M aureobasidin (A), or 0.2 mM fumonisin (B) for an additional 2 hours, and then extracted and separated by TLC according to “materials and methods”.

Figure S1

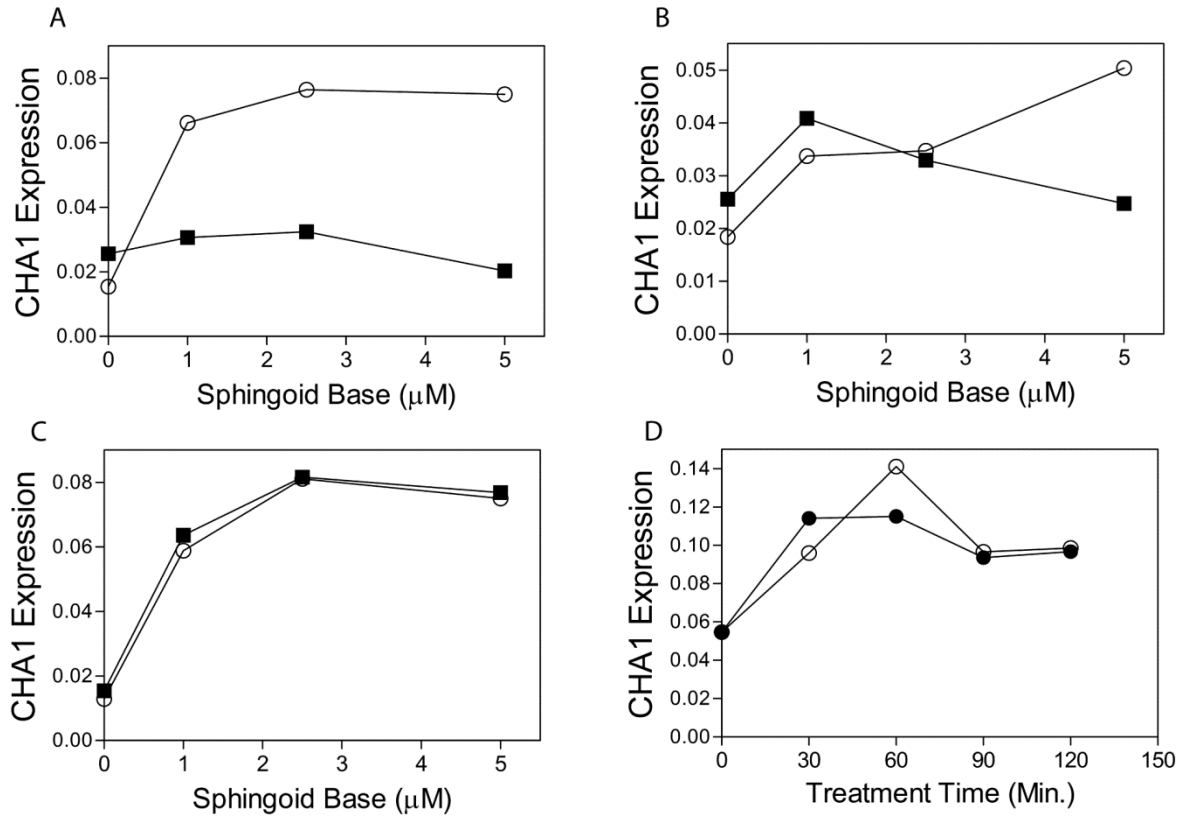

Figure S2

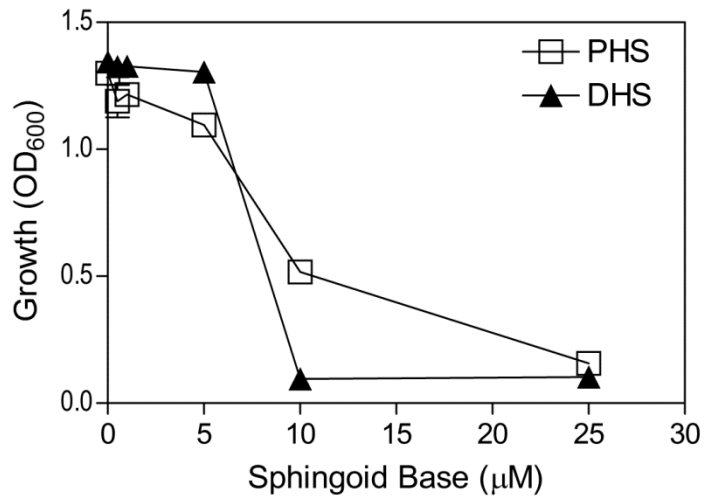

Figure S3

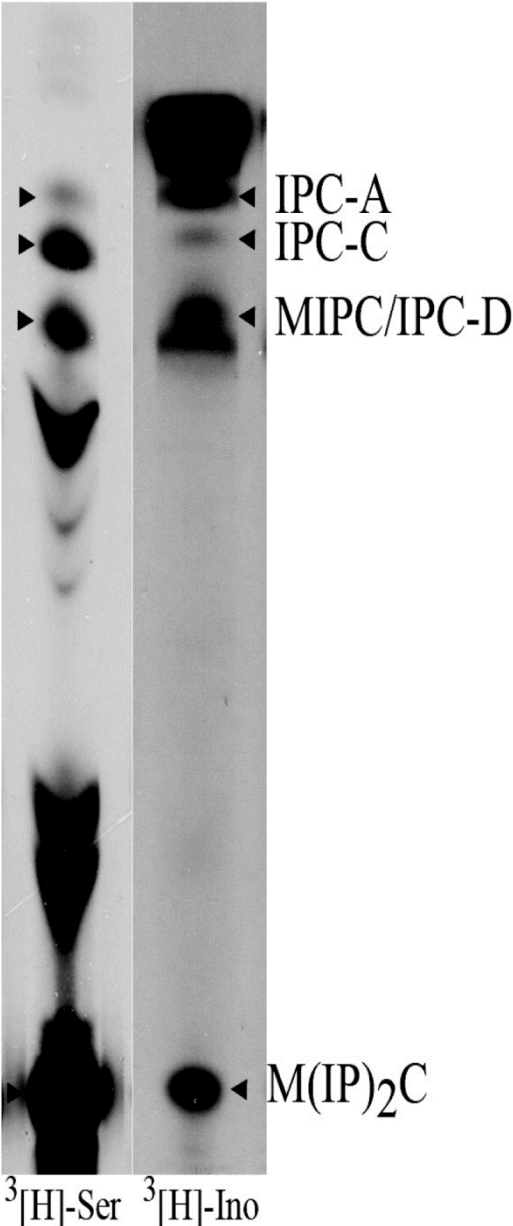

Figure S4

A

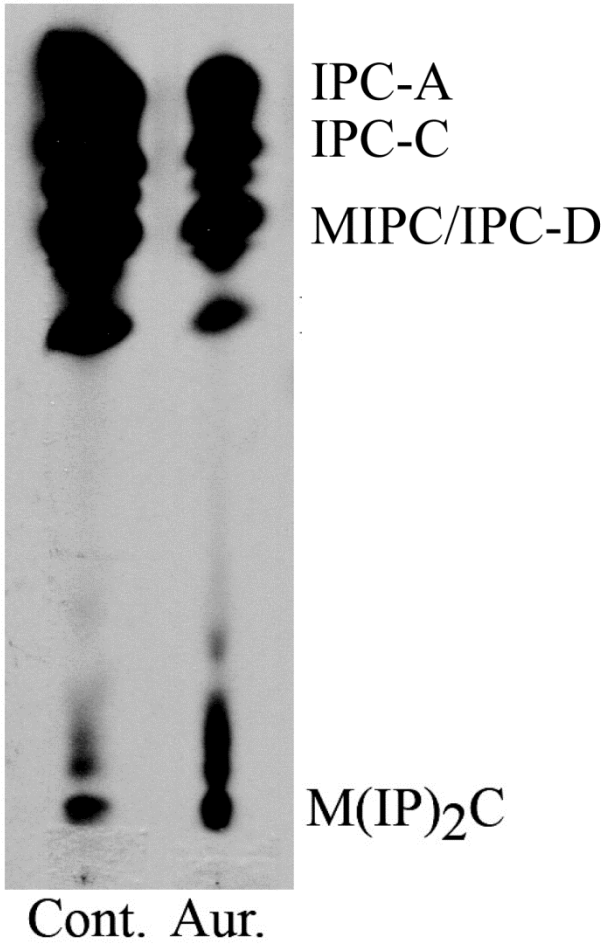

B

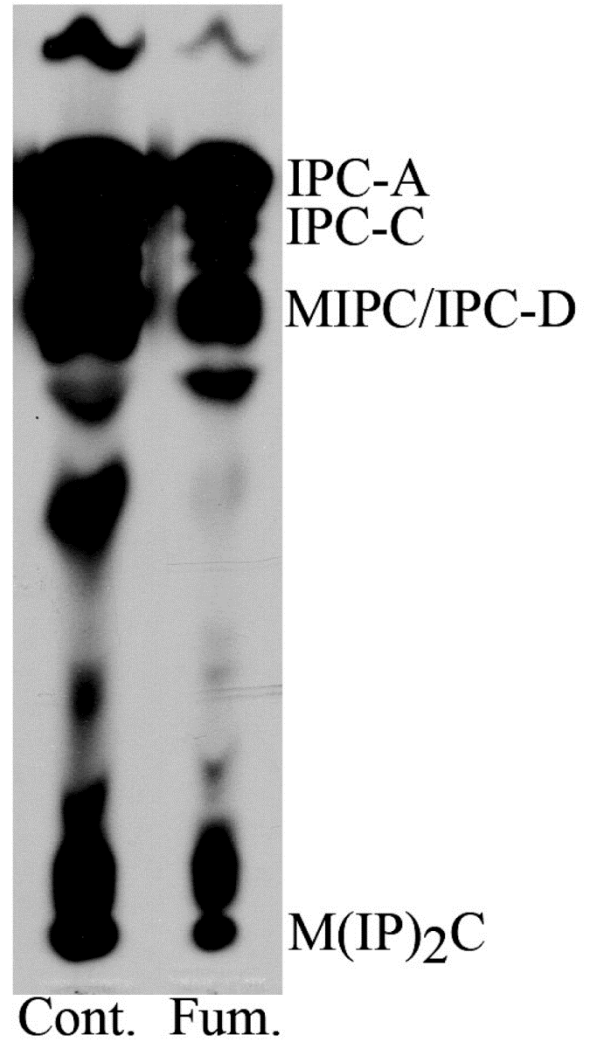

Supplement: supp_M111.313445_jbc.M111.313445-1.pdf [file supp_M111.313445_jbc.M111.313445-1.pdf]
